# Supplementary material for: EN1 Regulates Cell Growth and Proliferation in Human Glioma Cells via Hedgehog Signaling
Source: MDPI journal article supplement (doi:10.3390/ijms23031123), 2022-01-20
Supplement: s1 [file s1]

IJMS

Supplemental Information

## **EN1 regulates cell growth and proliferation in human glioma cells via Hedgehog signaling**

Jinchun Chang, Chenjia Guo, Jianyu Li, Zhangqian Liang, Yankai Wang, Anliang Yu, Runze Liu, Yuting Guo, Jian Chen,  
Song Huang

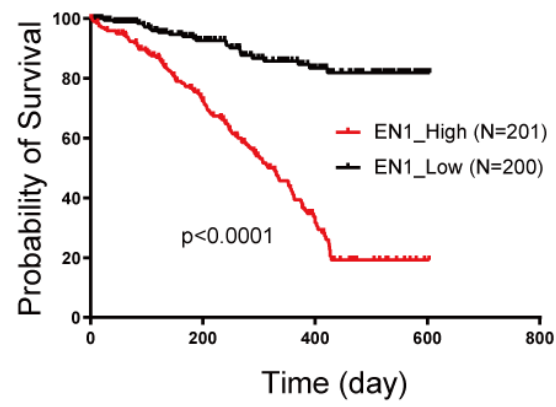

Figure S1 Prognosis result of EN1 expression in all the GBMLGG data set from TCGA.

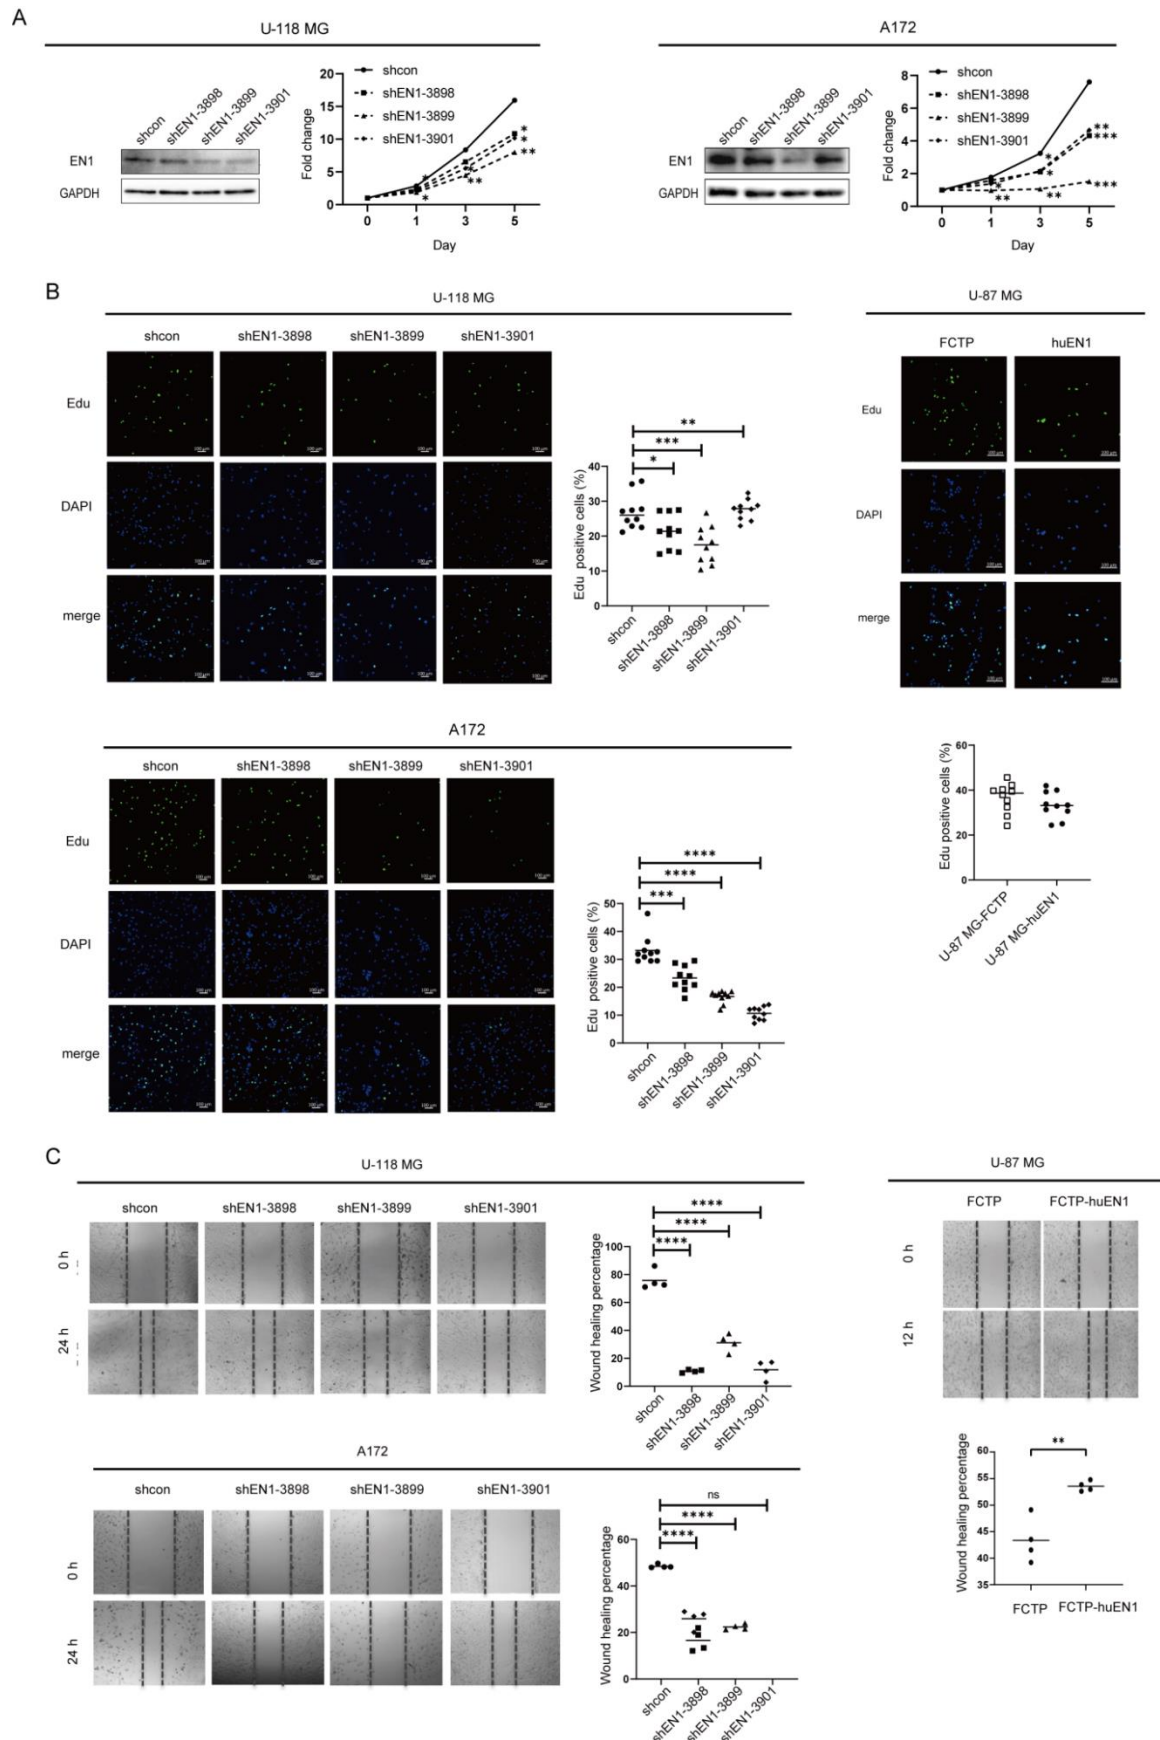

**Figure S2 EN1 knockdown restrains the proliferation and migration of glioma cells.** **A** Assessment of knockdown efficiency for EN1 in U-118 MG and A172 cells with immunoblotting and cell proliferation was assessed using CellTiter-Glo assays. 5-Ethynyl-2'-deoxyuridine (Edu) assays (**B**) and wound healing assay (**C**) was used in U-118 MG,

A172 and U-87 MG cells to assessment the effect of EN1 on cell proliferation and migration. Scale bar: 50  $\mu$ m. Data are presented as the mean from three independent experiments. \*  $p < 0.05$ , \*\*  $p < 0.01$ , \*\*\*  $p < 0.001$  by Student's t-test.

**Table S1** Variation of the percentage of RFP/muGFP (%) cells after 2, 9, 16 days of CRISPR-cas9 system action.

|          | Cell line      | Day 2   | Day 9   | Day 16  |
|----------|----------------|---------|---------|---------|
| U-118 MG | RFP-LacZ(NC)   | #       | #       | #       |
|          | muGFP-LacZ(NC) | 0       | 0       | 0       |
|          | RFP+PSMD1(PC)  | 101.446 | 103.713 | 129.474 |
|          | RFP+EN1 1-1    | 84.153  | 85.472  | 89.461  |
|          | RFP+EN1 1-2    | 103.282 | 97.217  | 122.506 |
|          | RFP+EN1 1-3    | 103.140 | 101.331 | 118.124 |
|          | RFP+EN1 1-4    | 79.160  | 98.929  | 87.811  |
| U251     | RFP-LacZ(NC)   | #       | #       | #       |
|          | muGFP-LacZ(NC) | 0       | 0       | 0       |
|          | RFP+PSMD1(PC)  | 111.852 | 138.742 | 223.332 |
|          | RFP+EN1 1-1    | 57.135  | 106.947 | 184.520 |
|          | RFP+EN1 1-2    | 65.924  | 120.655 | 191.119 |
|          | RFP+EN1 1-3    | 82.627  | 118.635 | 176.083 |
|          | RFP+EN1 1-4    | 49.907  | 94.970  | 198.915 |
| T98G     | RFP-LacZ(NC)   | #       | #       | #       |
|          | muGFP-LacZ(NC) | 0       | 0       | 0       |
|          | RFP+PSMD1(PC)  | 32.295  | 55.373  | 98.765  |
|          | RFP+EN1 1-1    | 31.050  | 52.337  | 74.328  |
|          | RFP+EN1 1-2    | 33.246  | 54.336  | 90.794  |
|          | RFP+EN1 1-3    | 54.238  | 67.720  | 94.470  |
|          | RFP+EN1 1-4    | 31.199  | 53.752  | 72.446  |

A

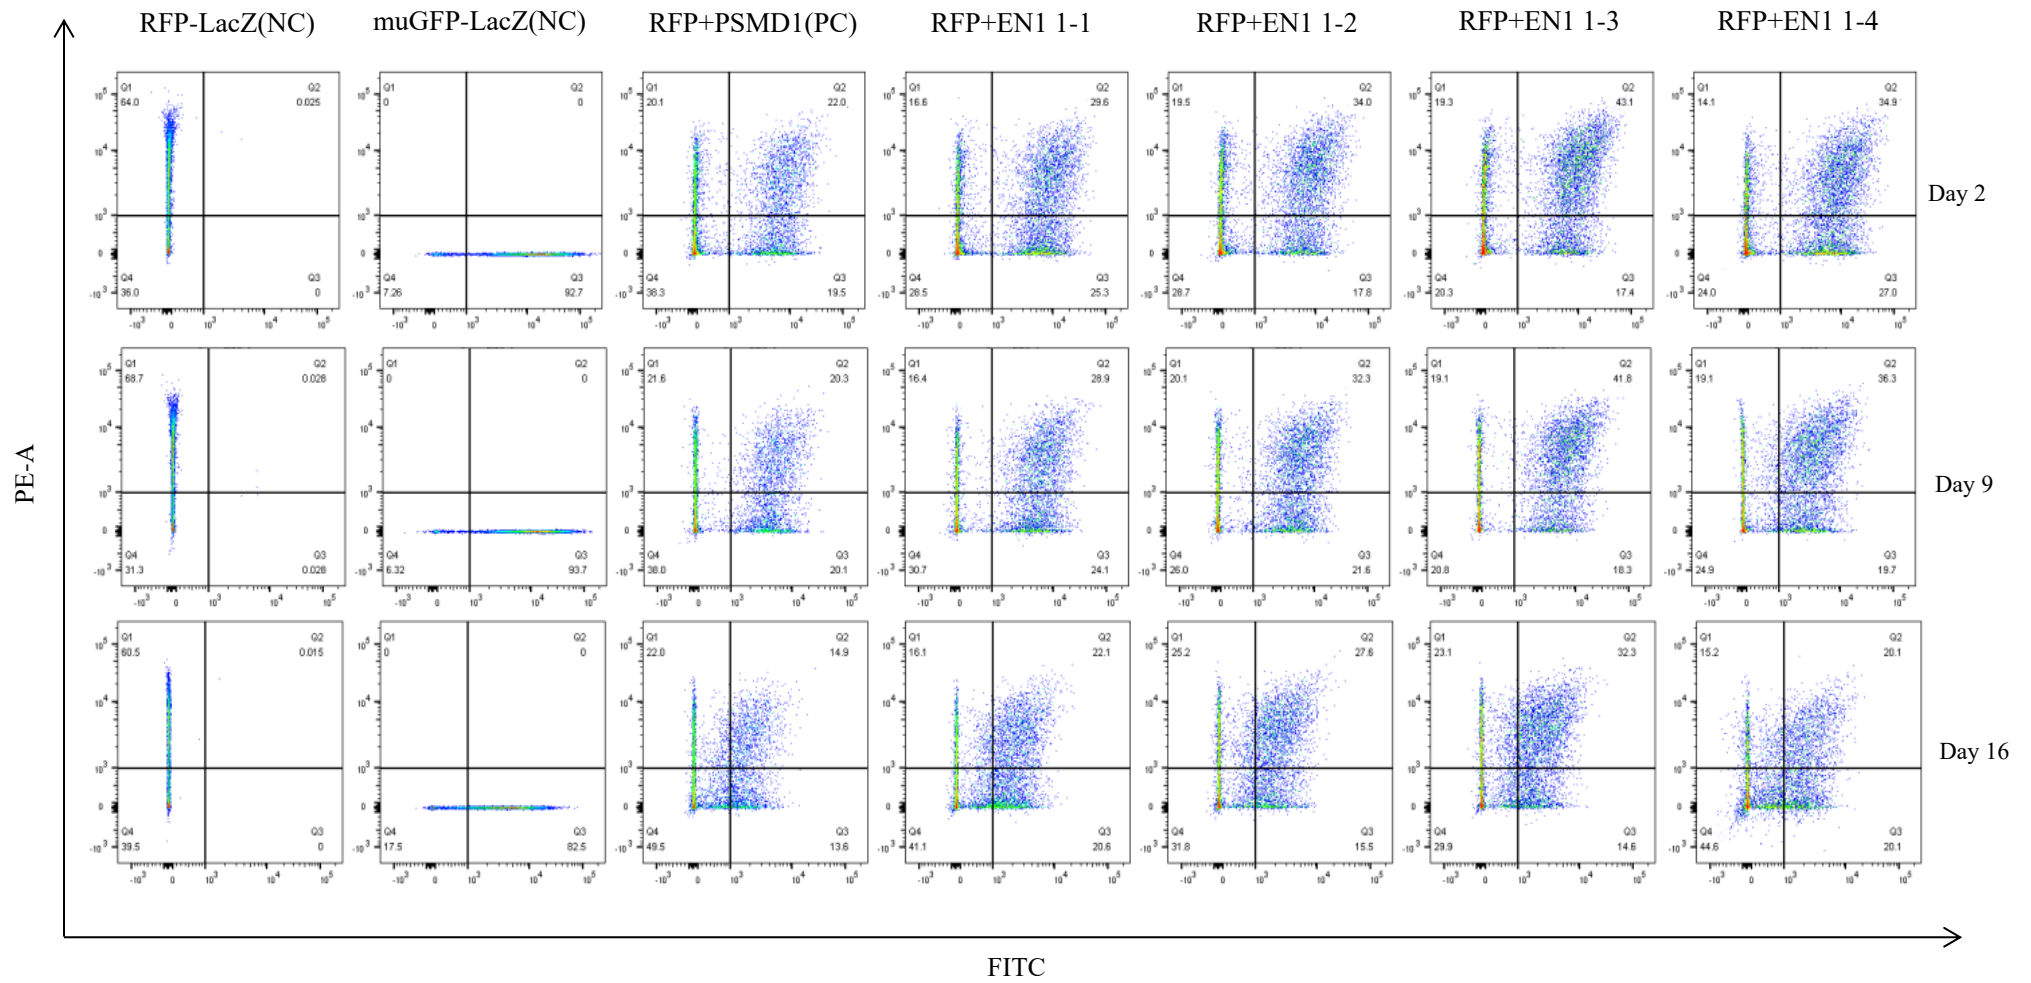

**B**

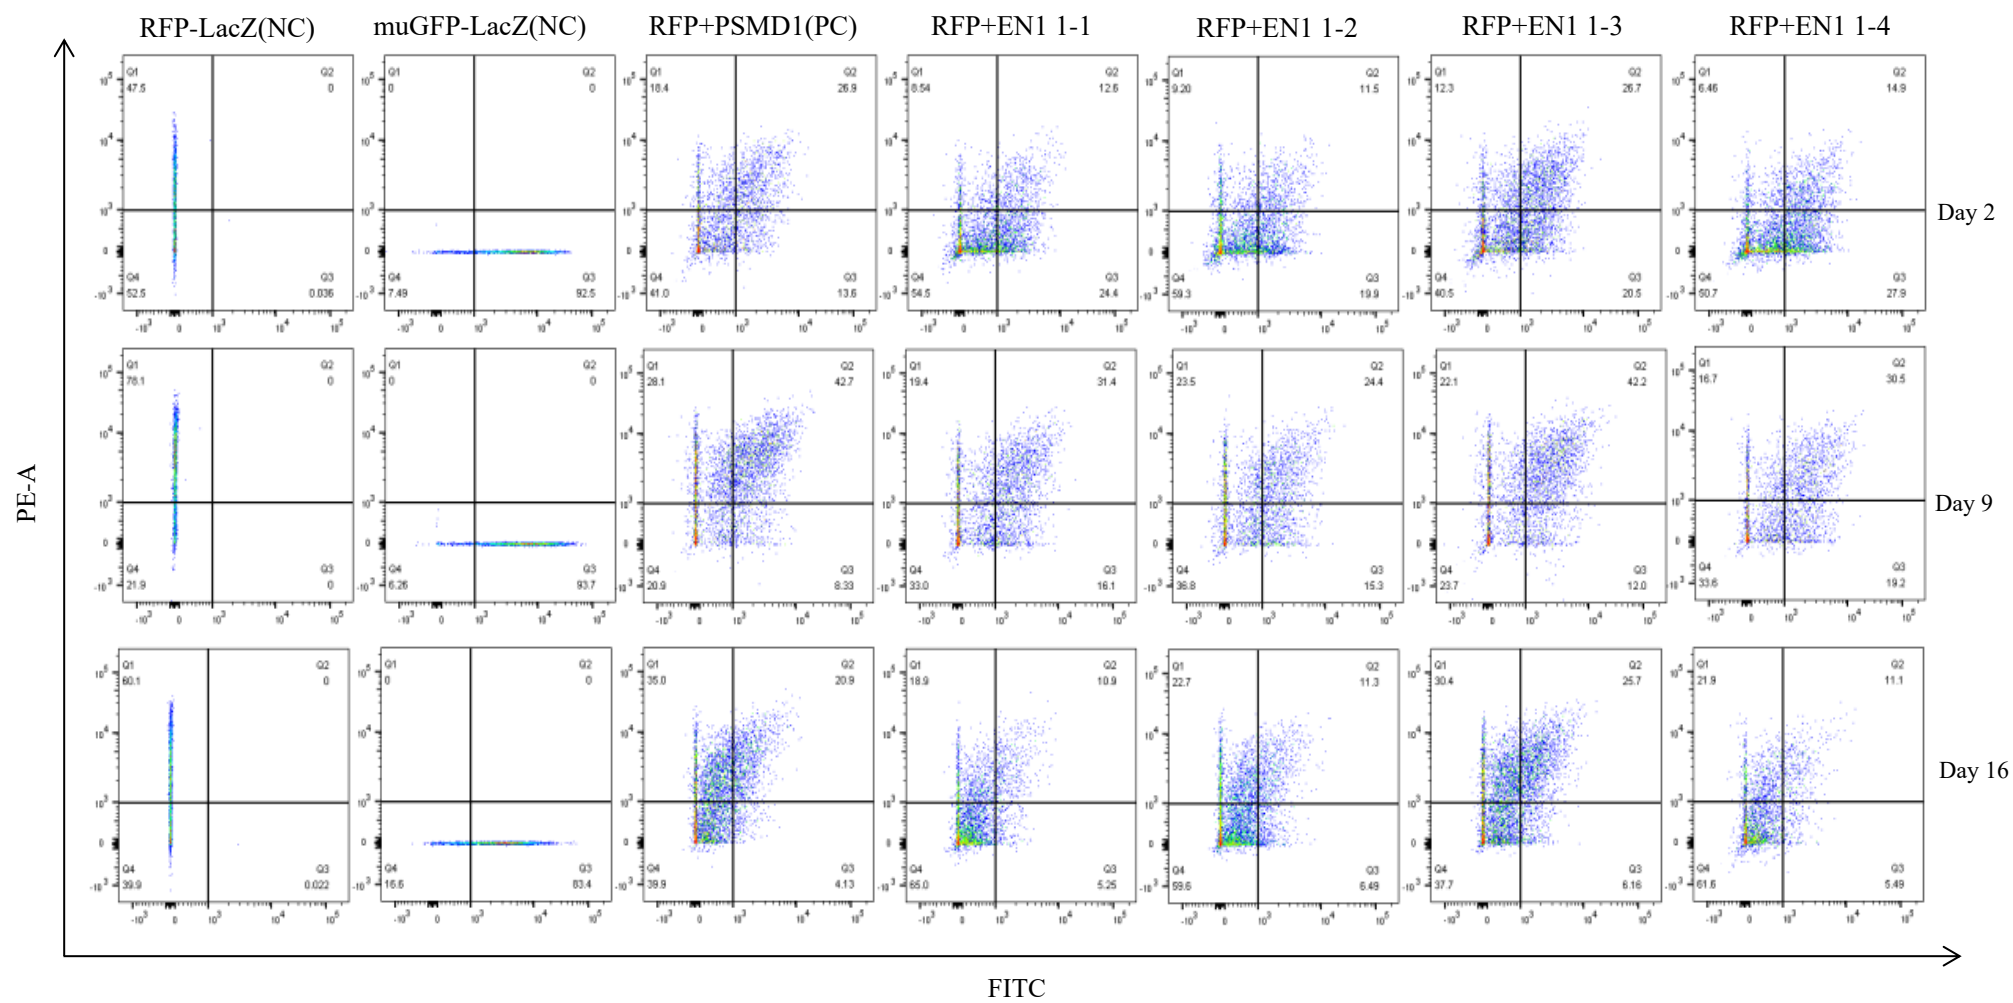

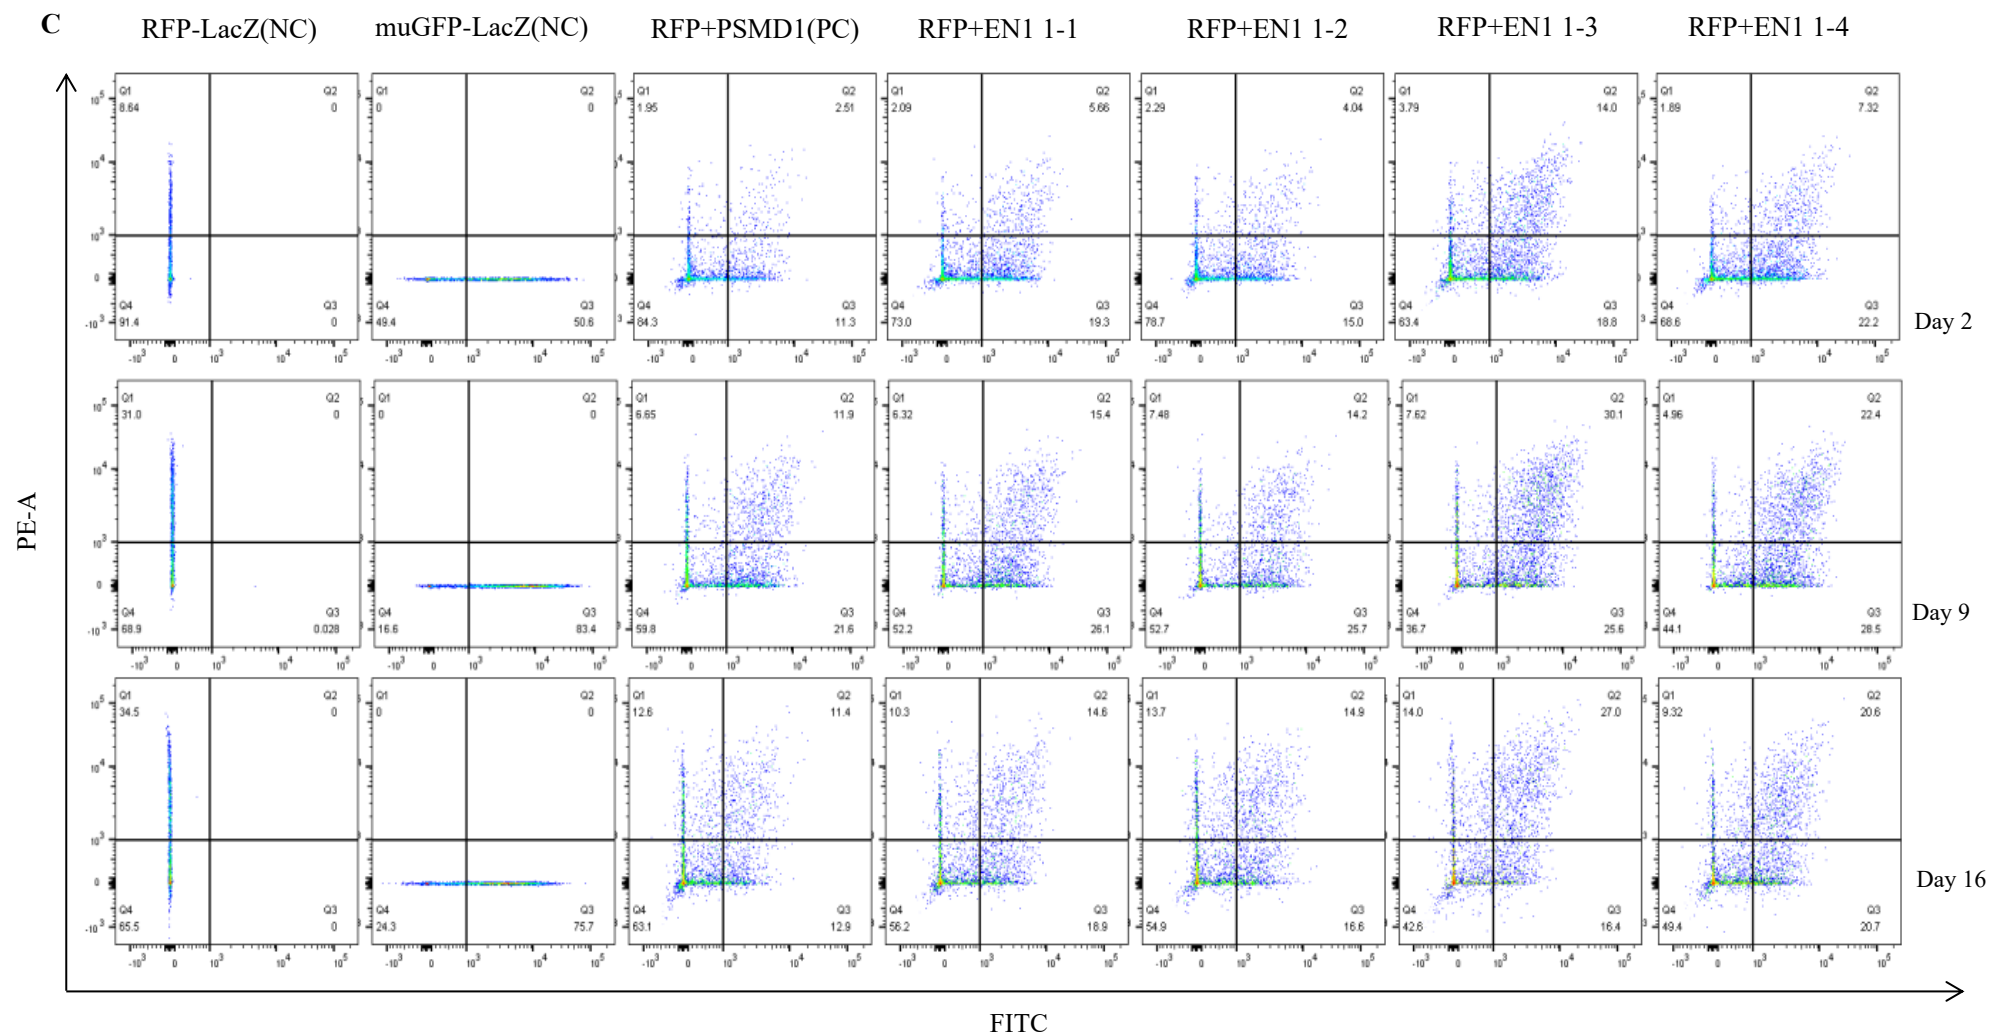

**Figure S3 Loss of function of EN1 leads to a decrease in cell proliferation or an increase in cell death.** CRISPR-Cas9/gRNA systems have been designed to detecting the impact of deficiencies of certain genes on cell proliferation. Cas9+ glioma cells infected with different sgRNA with RFP or muGFP labeling (sgLacZ as a negative control, sgPSMD1 as a positive control, four sgRNAs targeting EN1 as experimental groups), flow cytometry analysis of RFP/muGFP percentage after EN1 knock out in the U-118 MG, U251, and T98G glioma cell lines at 2, 9, 16 days respectively. **A** for the U118 cell line. **B** for the U251 cell line. **C** for the T98G cell line.

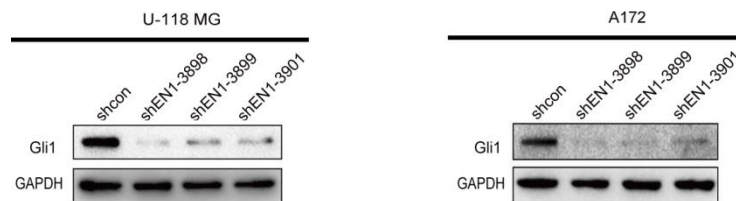

**Figure S4 Immunoblotting assays showing that EN1 knockdown significantly reduces the Gli1 level in U-118 MG, A172 glioma cells.**



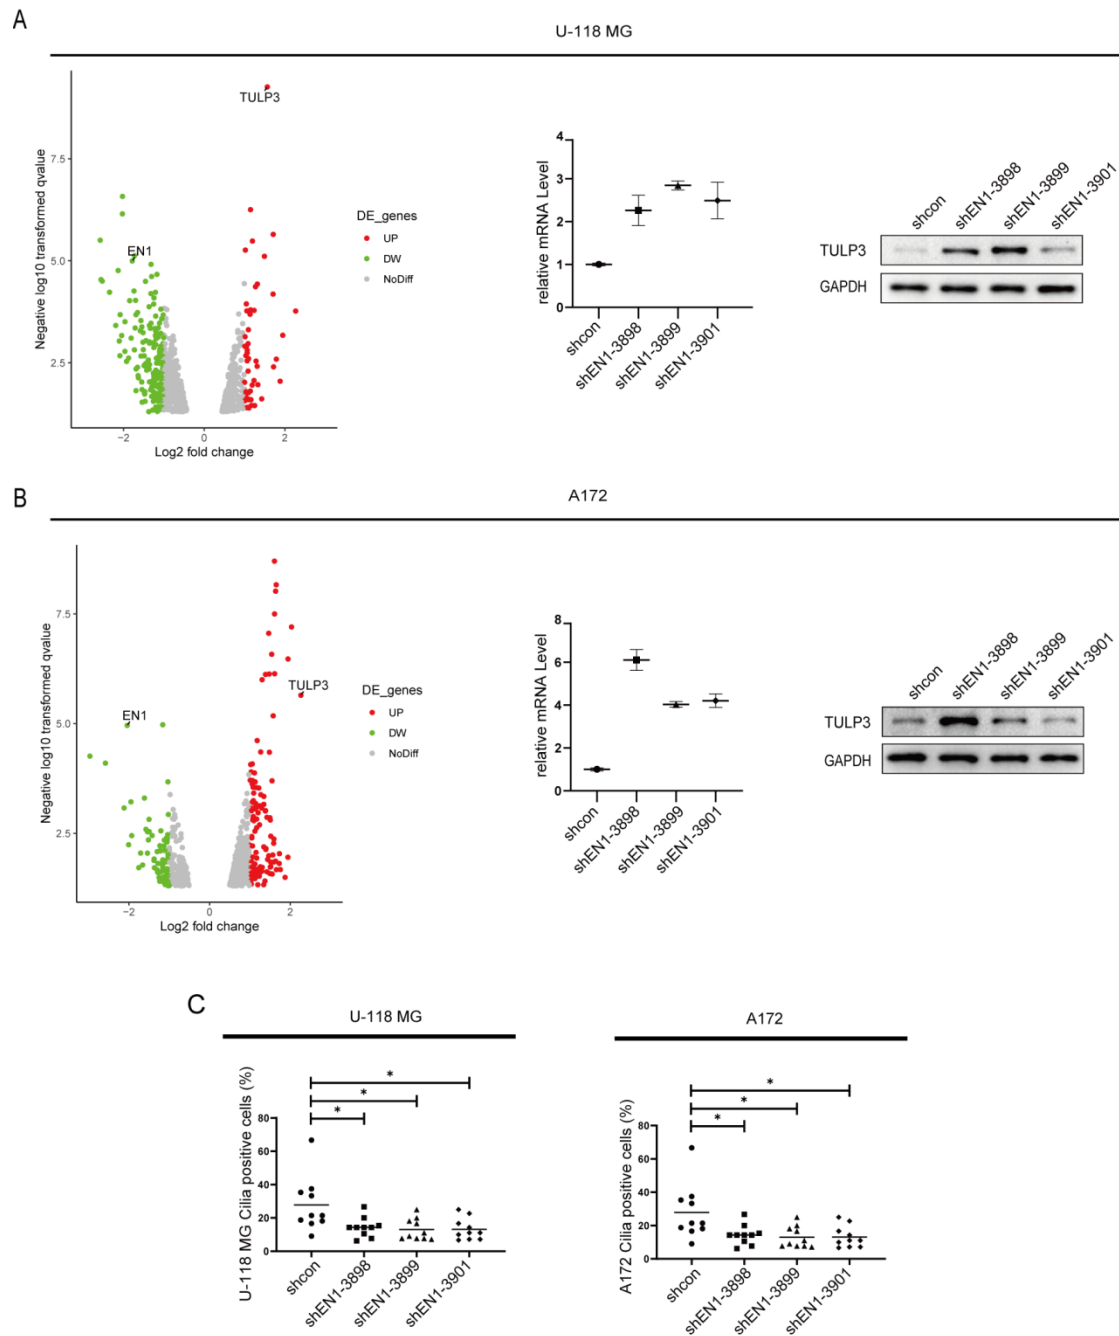

**Figure S5 Silencing EN1 upregulates the expression of TULP3.** Volcano plot of differentially expressed genes (DEGs) in EN1 knockdown glioma cells (vs. scramble control cells), qPCR and immunoblotting confirmed that EN1 knockdown glioma cells have elevated TULP3. U-118 MG (A), A172 (B). C EN1 knockdown significantly decreased number of primary cilia in U-118 MG, A172 glioma cells. Data are presented as the mean from three independent experiments. \*  $p < 0.05$ , \*\*  $p < 0.01$ , \*\*\*  $p < 0.001$  by Student's t-test.

**Table S2** List of primers used in this article.

| Gene           | Primer  | Nucleotide sequence 5'-3'                                       | Purpose          |
|----------------|---------|-----------------------------------------------------------------|------------------|
| plko-seq       | Forward | TTATGTTTTAAAATGGACTATCA                                         | ShRNA Sequencing |
| shcon          | Forward | CCGGCAACAAGATGAAGAGCACCAACTCG<br>AGTTGGTGCTCTTCATCTTGTTGTTTTTG  | shRNA            |
|                | Reverse | AATTCCAAAAACAACAAGATGAAGAGCAC<br>CAACTCGAGTTGGTGCTCTTCATCTTGTTG | shRNA            |
| ShRNA-EN1-3898 | Forward | CCGGCCATTCTCTATTCCCAGTATACTCGAG<br>TATACTGGGAATAGAGAATGGTTTTTG  | shRNA            |
|                | Reverse | AATTCCAAAAACCATTCTCTATTCCCAGTAT<br>ACTCGAGTATACTGGGAATAGAGAATGG | shRNA            |
| ShRNA-EN1-3899 | Forward | CCGGCAACCCGGCTATCCTACTTATCTCGAG<br>ATAAGTAGGATAGCCGGGTGTTTTTG   | shRNA            |
|                | Reverse | AATTCCAAAAACAACCCGGCTATCCTACTT<br>ATCTCGAGATAAGTAGGATAGCCGGGTG  | shRNA            |
| ShRNA-EN1-3901 | Forward | CCGGGATCAAGAAAGCCACAGGCATCTCGA<br>GATGCCTGTGGCTTCTTGATCTTTTTG   | shRNA            |
|                | Reverse | AATTCCAAAAAGATCAAGAAAGCCACAGG<br>CATCTCGAGATGCCTGTGGCTTCTTGATC  | shRNA            |
| sgRNA-huEN1-1  | Forward | GGCTTTATATATCTTGTGGAAAGGACGAAA<br>CACCGGCGAACTGTGGCCACCCGA      | sgRNA            |
|                | Reverse | GCCTTATTTTAACTTGCTATTTCTAGCTCTAA<br>AACTCGGGTGGGCCACAGTTCGC     | sgRNA            |
| sgRNA-huEN1-2  | Forward | GGCTTTATATATCTTGTGGAAAGGACGAAA<br>CACCGGCGGACTCGGCCCTCGGCG      | sgRNA            |
|                | Reverse | GCCTTATTTTAACTTGCTATTTCTAGCTCTAA<br>AACCGCCGAGGGCCGAGTCGCGC     | sgRNA            |
| sgRNA-huEN1-3  | Forward | GGCTTTATATATCTTGTGGAAAGGACGAAA<br>CACCGCCTGGCGCCCGGTGCCCAA      | sgRNA            |
|                | Reverse | GCCTTATTTTAACTTGCTATTTCTAGCTCTAA<br>AACTTGGGCACCCGGGCGCCAGG     | sgRNA            |
| sgRNA-huEN1-4  | Forward | GGCTTTATATATCTTGTGGAAAGGACGAAA<br>CACCGGATGTTGTCGATGAAAAAGT     | sgRNA            |
|                | Reverse | GCCTTATTTTAACTTGCTATTTCTAGCTCTAA<br>AACACTTTTTCATCGACAACATC     | sgRNA            |
| HuEN1          | Forward | AAGAGATCCAGTGCACCCTC                                            | Sequencing       |
|                | Reverse | CCTCCTCCTCCTGTATCGCT                                            | Sequencing       |
| Gli1           | Forward | TACTTCGCCCCTGCAGCAT                                             | Sequencing       |
|                | Reverse | GACTGAGGATGTGGGATCAT                                            | Sequencing       |
|                | Reverse | GTGCGTCTTCAGGTTTTTCGAGG                                         | Sequencing       |
|                | Reverse | CCCCTGCATTGGGGTTGTATC                                           | Sequencing       |
| TULP3          | Forward | CTGCCCTCAAGGTGTCACA                                             | Sequencing       |
|                | Reverse | GATCAATGGAGATAAGGTAGTTGGCTG                                     | Sequencing       |
| HuEN1          | Forward | CCGGAATTCCGGGCCACCATGGAGGAAC                                    | Amplification    |
|                | Reverse | CGCGGATCCGCG                                                    | Amplification    |

| Gene    | Primer  | Nucleotide sequence 5'-3'                    | Purpose       |
|---------|---------|----------------------------------------------|---------------|
|         |         | AGCGTAATCTGGAACATCGTA                        |               |
| Gli1    | Forward | CTAGTCTAGAATGTTCAACTCGATGACCCCA<br>CCACCAATC | Amplification |
|         | Reverse | TTGGCGCGCCTTAGGCACTAGAGTTGAGGA<br>ATTCTG     | Amplification |
| TULP3   | Forward | CTAGTCTAGACTAGATGGAGGCTTCGCGCTG<br>CCGGC     | Amplification |
|         | Reverse | CGCGGATCCGCGTCATTACACGCCAG                   | Amplification |
| HuGAPDH | Forward | AATCCCATCACCATCTTCCA                         | qPCR          |
|         | Reverse | TGGACTCCACGACGTACTCA                         | qPCR          |
| HuEN1   | Forward | ATCGTCCATCCTCCGGTCC                          | qPCR          |
|         | Reverse | GAAGTCCGCCTTGAGTCTCT                         | qPCR          |
| HuEN2   | Forward | CCGGCGTGGGTCTACTGTA                          | qPCR          |
|         | Reverse | CCTCTTTGTTCCGGTCTTCTT                        | qPCR          |
| PTCH1   | Forward | GAAGAAGGTGCTAATGTCCTGAC                      | qPCR          |
|         | Reverse | GTCCCAGACTGTAATTCGCC                         | qPCR          |
| SMO     | Forward | GAAGTGCCCTTGGTTCGGA                          | qPCR          |
|         | Reverse | GCAGGGTAGCGATTCGAGTT                         | qPCR          |
| GLI1    | Forward | AGCGTGAGCCTGAATCTGTG                         | qPCR          |
|         | Reverse | CAGCATGTACTGGGCTTTGAA                        | qPCR          |
| GLI2    | Forward | CTGCCTCCGAGAAGCAAGAAG                        | qPCR          |
|         | Reverse | GCATGGAATGGTGGCAAGAG                         | qPCR          |
| TULP3   | Forward | TGAGCCATTTATGGTGCAGC                         | qPCR          |
|         | Reverse | GCAGTATCCACGGTGTTTTTCAG                      | qPCR          |
| SHH     | Forward | CCAAGGCACATATCCACTGCT                        | qPCR          |
|         | Reverse | GTCTCGATCACGTAGAAGACCT                       | qPCR          |

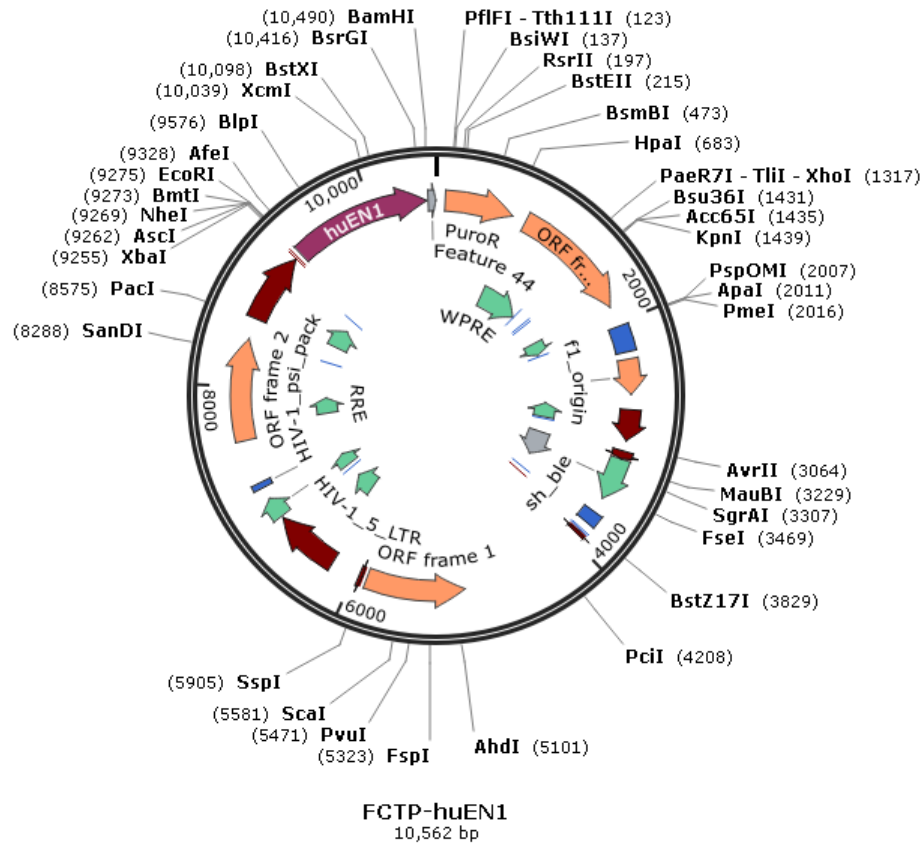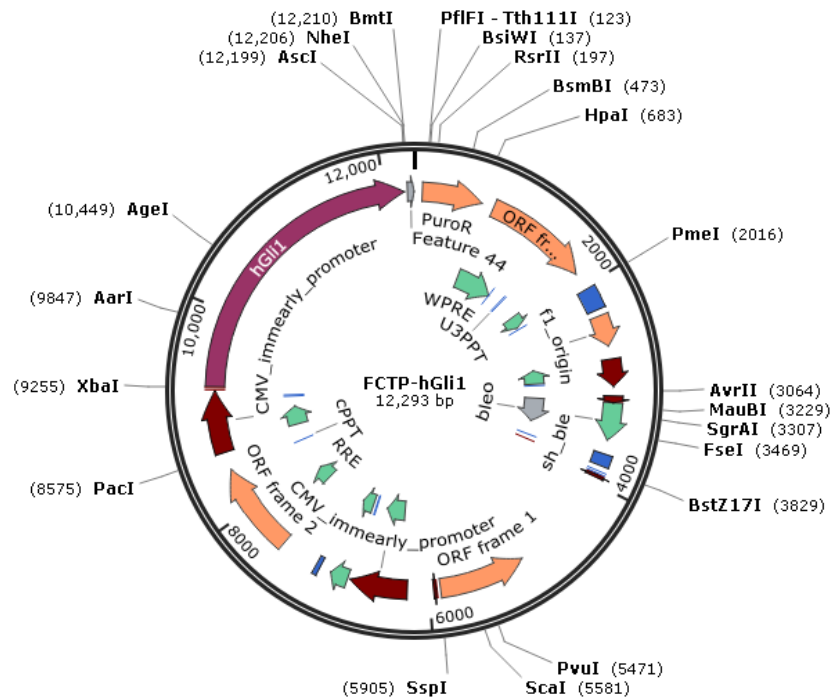

Figure S6 Schematic diagram of plasmid FCTP-huEN1 and FCTP-hGli1 structure.

**Table S3** List of antibody used in this article.

| <b>Antibody</b>                             | <b>Company</b>            | <b>Catalog number</b> |
|---------------------------------------------|---------------------------|-----------------------|
| EN1-2377                                    | NIBS                      | 2377                  |
| EN1-2378                                    | NIBS                      | 2378                  |
| EN1 Polyclonal Antibody                     | Invitrogen                | # PA5-14149           |
| Engrailed/injected gene products antibody   | University of California  | 4D9                   |
| Engrail-1 antibody                          | Columbia University       | 4G11                  |
| Anti-EN1 / Engrailed 1 antibody             | Abcam                     | ab70993               |
| Anti-EN1 / Engrailed 1 antibody             | Abcam                     | ab83693               |
| Anti-EN1 / Engrailed 1 antibody             | Abcam                     | ab108598              |
| Monoclonal Anti-EN1                         | Sigma-Aldrich             | SAB1403771-100UG      |
| Anti-EN1 Antibody                           | Atlas Antibodies          | HPA073141             |
| Anti-EN1 Polyclonal Antibody                | Cusabio                   | CSB-PA007659LA01CH    |
| GAPDH Mouse Monoclonal Antibody             | origene                   | TA802519              |
| GLI1 (C68H3) Rabbit mAb                     | Cell Signaling Technology | #3538                 |
| Shh (C9C5) Rabbit mAb                       | Cell Signaling Technology | #2207                 |
| TULP3 Mouse Monoclonal Antibody             | origene                   | TA504148              |
| Anti-mouse IgG, HRP-linked Antibody         | Cell Signaling Technology | 7076S                 |
| Anti-rabbit IgG, HRP-linked Antibody        | Cell Signaling Technology | 7074S                 |
| ARL13B                                      | proteintech               | 17711-1-AP            |
| acetylated Tubulin(Lys40)                   | proteintech               | 66200-1-Ig            |
| Goat anti-Mouse IgG (H+L), Alexa Fluor 594  | Invitrogen                | # A-11005             |
| Goat anti-Rabbit IgG (H+L), Alexa Fluor 488 | Invitrogen                | # A-11008             |

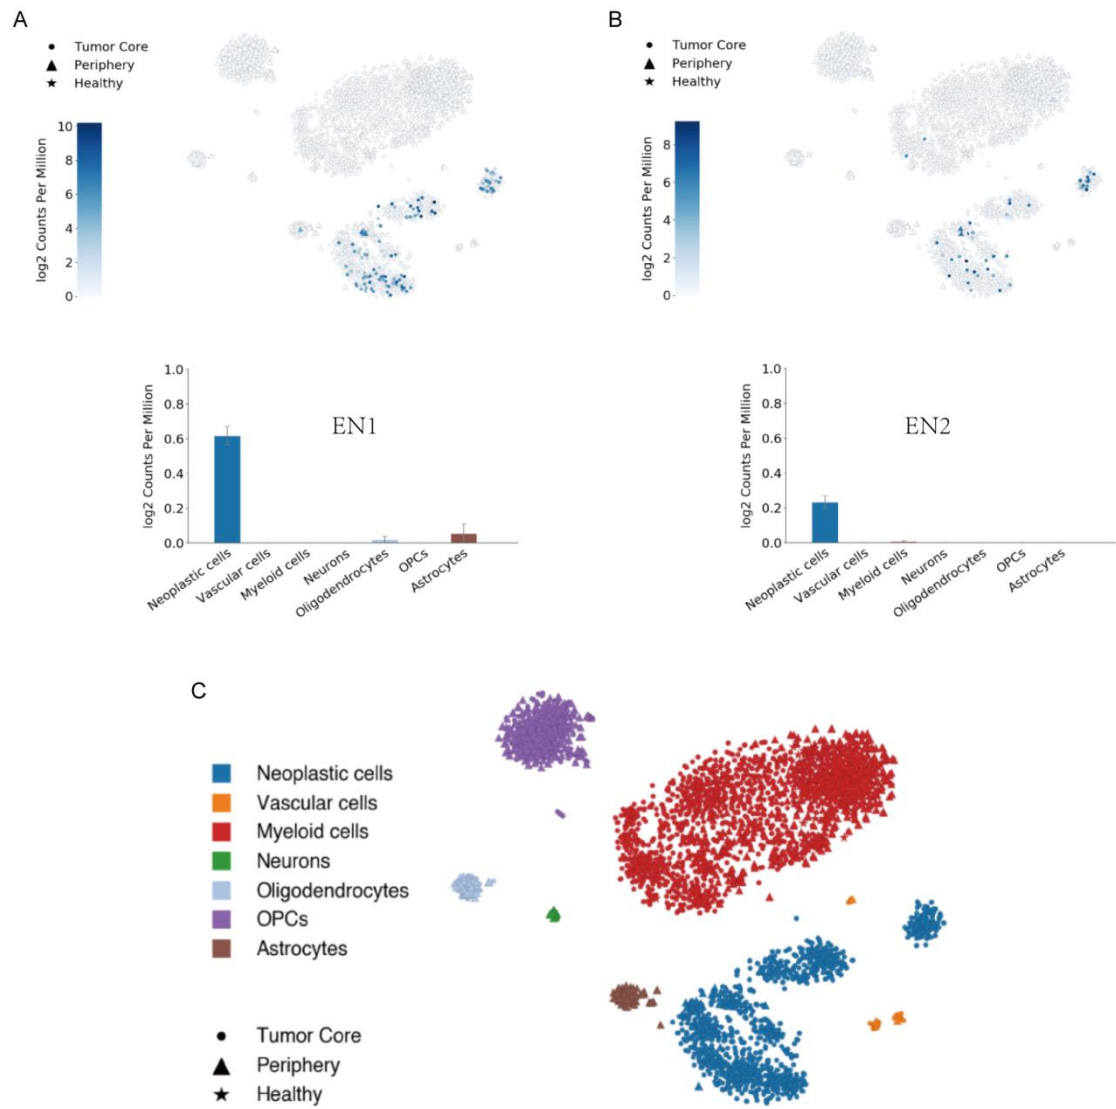

**Figure S7 EN1 and EN2 is mainly expressed by GBM tumor cells. A & B** Cell type and expression level of EN1 (A) and EN2 (B) expression in GBM single cell RNAseq. **C** Cell type annotation by single cell RNAseq of the GBM sample used for A & B.
